# Supplementary material
Source: PubMed Central journal article supplement (PMC4600359)
Supplement: hesr0050-1508-sd1.pdf [file hesr0050-1508-sd1.pdf]

**Appendix Table 1: Acceptance of New Medicaid and Privately Insured Patients Among Office-Based Primary Care Physicians**

*NAMCS Electronic Health Record Survey 2011/2012*

| State | Percent of Physicians Accepting New Medicaid Patients |                         | Percent of Physicians Accepting New Privately Insured Patients |                         |
|-------|-------------------------------------------------------|-------------------------|----------------------------------------------------------------|-------------------------|
|       | Mean                                                  | 95% confidence interval | Mean                                                           | 95% confidence interval |
| NJ    | 42.8                                                  | ( 26.3 - 59.3 )         | 92.9                                                           | ( 85.3 - 100.6 )        |
| CA    | 54.1                                                  | ( 37.6 - 70.6 )         | 78.3                                                           | ( 65.3 - 91.3 )         |
| IN    | 57.2                                                  | ( 43.0 - 71.4 )         | 75.3                                                           | ( 62.6 - 88.0 )         |
| VA    | 59.5                                                  | ( 45.7 - 73.4 )         | 89.1                                                           | ( 81.0 - 97.1 )         |
| ME    | 60.9                                                  | ( 48.3 - 73.6 )         | 69.8                                                           | ( 56.3 - 83.3 )         |
| MO    | 62.6                                                  | ( 50.2 - 75.0 )         | 86.1                                                           | ( 77.1 - 95.0 )         |
| CO    | 62.7                                                  | ( 51.2 - 74.3 )         | 80.0                                                           | ( 70.3 - 89.7 )         |
| TX    | 64.2                                                  | ( 51.3 - 77.0 )         | 81.5                                                           | ( 71.8 - 91.1 )         |
| GA    | 64.2                                                  | ( 48.5 - 79.9 )         | 79.9                                                           | ( 68.4 - 91.3 )         |
| KS    | 64.6                                                  | ( 50.9 - 78.3 )         | 83.5                                                           | ( 72.9 - 94.0 )         |
| OR    | 65.2                                                  | ( 52.3 - 78.1 )         | 87.0                                                           | ( 75.7 - 98.3 )         |
| AL    | 65.2                                                  | ( 51.8 - 78.6 )         | 91.6                                                           | ( 83.4 - 99.7 )         |
| AZ    | 67.6                                                  | ( 54.3 - 80.8 )         | 82.2                                                           | ( 70.3 - 94.1 )         |
| OK    | 68.0                                                  | ( 56.2 - 79.8 )         | 82.6                                                           | ( 73.1 - 92.2 )         |
| LA    | 68.3                                                  | ( 53.7 - 82.8 )         | 75.3                                                           | ( 62.1 - 88.4 )         |
| RI    | 68.9                                                  | ( 52.4 - 85.4 )         | 77.6                                                           | ( 64.5 - 90.7 )         |
| HI    | 69.8                                                  | ( 55.9 - 83.7 )         | 75.0                                                           | ( 61.4 - 88.7 )         |
| OH    | 70.1                                                  | ( 57.0 - 83.2 )         | 86.5                                                           | ( 76.7 - 96.3 )         |
| FL    | 71.1                                                  | ( 56.4 - 85.8 )         | 86.7                                                           | ( 75.4 - 97.9 )         |
| PA    | 71.7                                                  | ( 56.8 - 86.6 )         | 81.4                                                           | ( 68.6 - 94.3 )         |
| WV    | 72.6                                                  | ( 59.2 - 86.0 )         | 72.4                                                           | ( 59.2 - 85.5 )         |
| WA    | 73.7                                                  | ( 62.3 - 85.0 )         | 90.2                                                           | ( 82.8 - 97.7 )         |
| CT    | 73.7                                                  | ( 58.2 - 89.2 )         | 84.2                                                           | ( 71.3 - 97.2 )         |
| IL    | 74.4                                                  | ( 60.6 - 88.2 )         | 83.3                                                           | ( 71.4 - 95.2 )         |
| TN    | 75.5                                                  | ( 62.8 - 88.3 )         | 91.3                                                           | ( 82.7 - 99.9 )         |
| NY    | 75.9                                                  | ( 62.2 - 89.6 )         | 85.9                                                           | ( 71.6 - 100.1 )        |
| VT    | 77.4                                                  | ( 67.7 - 87.1 )         | 85.5                                                           | ( 77.0 - 94.0 )         |
| MD    | 77.4                                                  | ( 63.1 - 91.8 )         | 87.6                                                           | ( 76.5 - 98.8 )         |
| MI    | 78.3                                                  | ( 65.7 - 90.9 )         | 91.0                                                           | ( 83.1 - 98.9 )         |
| NV    | 78.6                                                  | ( 66.9 - 90.4 )         | 86.9                                                           | ( 76.7 - 97.1 )         |
| UT    | 79.7                                                  | ( 69.4 - 90.0 )         | 88.1                                                           | ( 79.8 - 96.4 )         |
| KY    | 81.2                                                  | ( 69.1 - 93.3 )         | 92.8                                                           | ( 85.6 - 99.9 )         |
| SC    | 83.6                                                  | ( 71.5 - 95.6 )         | 87.6                                                           | ( 76.8 - 98.4 )         |
| NH    | 84.0                                                  | ( 75.0 - 92.9 )         | 91.8                                                           | ( 84.9 - 98.7 )         |
| AR    | 85.8                                                  | ( 77.2 - 94.4 )         | 88.0                                                           | ( 79.8 - 96.2 )         |
| NE    | 86.1                                                  | ( 78.0 - 94.2 )         | 86.8                                                           | ( 79.2 - 94.5 )         |
| ID    | 86.3                                                  | ( 77.6 - 94.9 )         | 97.1                                                           | ( 93.3 - 101.0 )        |
| NM    | 86.6                                                  | ( 77.4 - 95.9 )         | 80.2                                                           | ( 69.6 - 90.8 )         |
| NC    | 87.3                                                  | ( 78.4 - 96.3 )         | 94.1                                                           | ( 87.6 - 100.6 )        |
| ND    | 88.4                                                  | ( 80.5 - 96.4 )         | 81.0                                                           | ( 70.8 - 91.1 )         |
| WI    | 88.5                                                  | ( 79.8 - 97.1 )         | 83.3                                                           | ( 72.2 - 94.3 )         |
| IA    | 89.8                                                  | ( 83.3 - 96.2 )         | 78.4                                                           | ( 68.6 - 88.2 )         |
| SD    | 90.6                                                  | ( 83.6 - 97.6 )         | 88.5                                                           | ( 81.2 - 95.8 )         |
| MT    | 92.7                                                  | ( 86.3 - 99.0 )         | 91.2                                                           | ( 84.3 - 98.2 )         |
| MA    | 94.7                                                  | ( 88.2 - 101.2 )        | 87.8                                                           | ( 78.3 - 97.3 )         |
| MS    | 95.0                                                  | ( 89.2 - 100.7 )        | 85.3                                                           | ( 74.7 - 95.9 )         |

Note: The sample size across states is 2,478 physicians.

**Appendix Table 2: Association Between State Acceptance of New Medicaid Patients and other State and Child Characteristics and the Probability that a Child's Family Had Been Told by a Doctor's Office or Clinic in the Past Year That They Did Not Accept the Child's Health Insurance Coverage**

NAMCS Electronic Healthl Record Survey 2011/2012 and NHIS 2011/2012

| <i>Effects in percentage points</i>                                                                      | Percent of Medicaid<br>Sample | Medicaid/CHIP<br>sample (n = 9,009) | Medicaid/CHIP+<br>private insurance<br>sample (n = 11,778) |
|----------------------------------------------------------------------------------------------------------|-------------------------------|-------------------------------------|------------------------------------------------------------|
| <b>State % of primary care physicians accepting new Medicaid patients (relative to 75% +)</b>            |                               |                                     |                                                            |
| <60%                                                                                                     | 20.10                         | 4.16***<br>(1.15)                   | 0.29<br>(0.39)                                             |
| 60-74%                                                                                                   | 49.40                         | 1.79**<br>(0.72)                    | 0.13<br>(0.30)                                             |
| <b>Insurage Coverage (Relative to private insurance)</b>                                                 |                               |                                     |                                                            |
| Medicaid                                                                                                 | 100.00                        | --                                  | 2.99***<br>(0.56)                                          |
| <b>Medicaid * State % of primary care physicians accepting new Medicaid patients (relative to 75% +)</b> |                               |                                     |                                                            |
| <60%                                                                                                     | --                            | --                                  | 2.64***<br>(0.95)                                          |
| 60-74%                                                                                                   | --                            | --                                  | 1.29*<br>(0.72)                                            |
| <b>Gender (relative to male)</b>                                                                         |                               |                                     |                                                            |
| Female                                                                                                   | 49.51                         | 0.34<br>(0.51)                      | 0.25<br>(0.27)                                             |
| <b>Race/ethnicity (relative to Non-Hispanic white)</b>                                                   |                               |                                     |                                                            |
| Non-Hispanic black                                                                                       | 35.85                         | 2.32***<br>(0.71)                   | 1.46***<br>(0.40)                                          |
| Hispanic                                                                                                 | 23.03                         | 0.51<br>(0.68)                      | 1.07**<br>(0.49)                                           |
| Non-Hispanic other race                                                                                  | 4.66                          | -0.97<br>(0.83)                     | -0.02<br>(0.41)                                            |
| <b>Ratio of family income to the poverty level (Relative to over 400% )</b>                              |                               |                                     |                                                            |
| No more than 200%                                                                                        | 84.74                         | -9.08***<br>(2.78)                  | -0.78*<br>(0.43)                                           |
| 201-400%                                                                                                 | 13.29                         | -8.44***<br>(2.78)                  | -0.02<br>(0.25)                                            |
| <b>General health status (relative to excellent, very good, or good)</b>                                 |                               |                                     |                                                            |
| Fair or poor                                                                                             | 3.81                          | 2.63<br>(1.65)                      | 4.04**<br>(1.85)                                           |
| <b>State # of primary care physicians per 1,000 population (relative to no more than 0.55)</b>           |                               |                                     |                                                            |
| 0.56 - 0.64                                                                                              | 52.06                         | -0.39<br>(0.87)                     | -0.70*<br>(0.40)                                           |
| 0.65+                                                                                                    | 22.68                         | 0.69<br>(0.86)                      | -0.04<br>(0.47)                                            |
| <b>State Medicaid managed care penetration rate (relative to at least 75% )</b>                          |                               |                                     |                                                            |
| <60%                                                                                                     | 37.83                         | 0.74<br>(0.86)                      | -0.10<br>(0.43)                                            |
| 65-74%                                                                                                   | 32.52                         | 1.35*<br>(0.79)                     | 0.15<br>(0.47)                                             |

Note: The table reports coefficients (and standard errors in parentheses) from linear probability models. The symbols \*, \*\*, and \*\*\* indicate statistical significance at the 10, 5 and 1 percent levels, respectively.

**Appendix Table 3: Acceptance of New Medicaid Patients Among Office-Based Primary Care Physicians and the Percent of Children on Medicaid or CHIP with At Least One Physician Visit or Visit with a Health Care Professional in the Past Year**

*NHIS and NAMCS Electronic Health Record Survey 2011/2012*

| State | Percent of Primary Care Physicians<br>Accepting New Medicaid Patients |                            | Percent of Children on Medicaid or CHIP with<br>At Least One Doctor Visit in the Past Year |                            |
|-------|-----------------------------------------------------------------------|----------------------------|--------------------------------------------------------------------------------------------|----------------------------|
|       | Mean                                                                  | 95% confidence<br>interval | Mean                                                                                       | 95% confidence<br>interval |
| WA    | 78.8                                                                  | ( 62.3 - 85.0 )            | 85.8                                                                                       | ( 79.0 - 92.5 )            |
| NJ    | 44.4                                                                  | ( 26.3 - 59.3 )            | 88.8                                                                                       | ( 82.0 - 95.8 )            |
| CA    | 54.5                                                                  | ( 37.6 - 70.6 )            | 90.0                                                                                       | ( 87.6 - 92.4 )            |
| OK    | 70.3                                                                  | ( 56.2 - 79.8 )            | 90.0                                                                                       | ( 87.7 - 92.3 )            |
| GA    | 68.1                                                                  | ( 48.5 - 79.9 )            | 90.0                                                                                       | ( 83.9 - 96.1 )            |
| KY    | 79.6                                                                  | ( 69.1 - 93.3 )            | 90.4                                                                                       | ( 86.0 - 94.8 )            |
| LA    | 67.0                                                                  | ( 53.7 - 82.8 )            | 90.6                                                                                       | ( 86.2 - 94.9 )            |
| AR    | 88.5                                                                  | ( 77.2 - 94.4 )            | 90.6                                                                                       | ( 87.5 - 93.7 )            |
| FL    | 59.0                                                                  | ( 56.4 - 85.8 )            | 91.1                                                                                       | ( 87.3 - 94.9 )            |
| OH    | 75.5                                                                  | ( 57.0 - 83.2 )            | 91.7                                                                                       | ( 88.2 - 95.2 )            |
| IL    | 61.8                                                                  | ( 60.6 - 88.2 )            | 92.2                                                                                       | ( 88.3 - 96.2 )            |
| TX    | 71.6                                                                  | ( 51.3 - 77.0 )            | 92.5                                                                                       | ( 90.2 - 94.8 )            |
| AZ    | 75.2                                                                  | ( 54.3 - 80.8 )            | 92.5                                                                                       | ( 85.8 - 99.2 )            |
| NY    | 60.5                                                                  | ( 62.2 - 89.6 )            | 93.8                                                                                       | ( 90.8 - 96.8 )            |
| NC    | 82.4                                                                  | ( 78.4 - 96.3 )            | 94.6                                                                                       | ( 91.4 - 97.7 )            |
| AL    | 66.3                                                                  | ( 51.8 - 78.6 )            | 94.8                                                                                       | ( 89.2 - 100.0 )           |
| MI    | 80.9                                                                  | ( 65.7 - 90.9 )            | 96.6                                                                                       | ( 93.8 - 99.4 )            |
| PA    | 74.5                                                                  | ( 56.8 - 86.6 )            | 96.7                                                                                       | ( 93.6 - 99.8 )            |
